# Supplementary material
Source: publisher figshare collection journal article supplement (https://tandf.figshare.com/articles/dataset/_/11421243)
Supplement: Supplementary file 1 [file 1]

Archive with 2 entries (2 files):
- ipec_a_1695301_sm9906.docx
- ipec_a_1695301_sm9332.pdf
