# Supplementary material
Source: publisher figshare collection journal article supplement (https://tandf.figshare.com/articles/dataset/_/11421243)
Supplement: Supplementary file 1 [file 1 › ipec_a_1695301_sm9332.pdf]

## Appendix A

### Recertification Survey

For how many different organizations do you currently perform EMS work?

- ☐ 0  
☐ 1  
☐ 2 or more
- 

Which of the following comes closest to best describing the length of the shifts you typically work at your main EMS job?

- ☐ I don't work shifts at my main EMS job  
☐ 8 hours  
☐ 10 hours  
☐ 12 hours  
☐ 24 hours  
☐ 36 hours  
☐ 48 hours  
☐ Other - Write In:

Over the past 4 weeks, how many hours on average did you work at any job (including EMS and non-EMS jobs)?

- ☐ 0  
☐ 1-20  
☐ 21-40  
☐ 41 or more hours
- 

Please indicate how much you agree or disagree with the following statements:

|                                         | Strongly agree        | Agree                 | Disagree              | Strongly disagree     |
|-----------------------------------------|-----------------------|-----------------------|-----------------------|-----------------------|
| I depend on overtime to make ends meet. | <input type="radio"/> | <input type="radio"/> | <input type="radio"/> | <input type="radio"/> |

|                                                  |                       |                       |                       |                       |
|--------------------------------------------------|-----------------------|-----------------------|-----------------------|-----------------------|
| I depend on more than one job to make ends meet. | <input type="radio"/> | <input type="radio"/> | <input type="radio"/> | <input type="radio"/> |
|--------------------------------------------------|-----------------------|-----------------------|-----------------------|-----------------------|

---

How satisfied are you with your main EMS job?

- ☐ Very Satisfied
- ☐ Satisfied
- ☐ Dissatisfied
- ☐ Very Dissatisfied

How likely is it that you will leave the EMS profession within the next 12 months?

- ☐ Definitely will not leave
- ☐ Probably will not leave
- ☐ Probably will leave
- ☐ Definitely will leave

How likely is it that you will leave the EMS profession within the next 5 years?

- ☐ Definitely will not leave
- ☐ Probably will not leave
- ☐ Probably will leave
- ☐ Definitely will leave

---

### **Survey Thank You**

Thank you for completing this survey. Your response is very important to us and will help shape our profession!
