# Supplementary material
Source: publisher figshare collection journal article supplement (https://tandf.figshare.com/articles/dataset/_/11421243)
Supplement: Supplementary file 1 [file 1 › ipec_a_1695301_sm9906.docx]

**APPENDIX B**:

Demographics of both survey respondents and the full population of nationally-certified EMS professionals who recertified in the 2017-2018 cycle. Abbreviations- IQR: Interquartile range; EMT; Emergency Medical Technician; AEMT: Advanced Emergency Medical Technician; EMS: Emergency Medical Services.

| Characteristic | Survey respondents  N = 18,284  n (%) | Recertification Population  N = 101,363  n (%) |
| --- | --- | --- |
| Sex |  |  |
| Male | 13,600 (74.4) | 72,775 (74.3) |
| Female | 4,643 (25.4) | 25,196 (25.7) |
| *Missing* | 41 | 3,392 |
| Age- median (IQR) | 38 (30 – 48) | 35 (28 – 44) |
| Minority Status |  |  |
| White, non-Hispanic | 15,856 (88.8) | 77,418 (81.4) |
| Minority | 1,992 (11.2) | 17,675 (18.6) |
| *Missing* | 436 | 6,270 |
| Urbanicity |  |  |
| Urban | 11,208 (61.3) | 72,906 (71.9) |
| Rural | 7,076 (38.7) | 28,457 (28.1) |
| *Missing* | 344 | 23,242 |
| Certification Level |  |  |
| EMT | 7,643 (41.8) | 60,377 (59.6) |
| AEMT | 904 (4.9) | 3,814 (3.8) |
| Paramedic | 9,737 (53.3) | 37,172 (36.7) |
| *Missing* | 0 | 0 |
| Agency Type |  |  |
| Hospital | 2,315 (12.7) | 7,998 (9.9) |
| Fire | 7,383 (40.5) | 35,447 (43.9) |
| Private | 4,255 (23.4) | 15,878 (19.7) |
| Government Non-Fire | 2,526 (13.9) | 10,003 (12.4) |
| Air Medical | 793 (4.4) | 2,134 (2.6) |
| Other | 953 (5.2) | 3,928 (4.9) |
| *Missing* | 59 | 20,549 |
| Full-Time at Main Agency | 13,386 (73.8) | 61,164 (76.2) |
| *Missing* | 155 | 21,094 |
| Volunteer at Main Agency | 2,644 (14.5) | 10,142 (12.6) |
| *Missing* | 64 | 20,593 |
